# Supplementary material for: Effect of Rehabilitation in a Dog with Delayed Recovery following TPLO: A Case Report
Source: MDPI journal article supplement (doi:10.3390/ani13172778), 2023-08-31
Supplement: s1 [file s1]

Dog's Name:

Date:

### Helsinki Chronic Pain Index

Hielm-Bjorkman HK, Rita H, Tulamo R-M. Psychometric testing of the Helsinki chronic pain index by completion of a questionnaire in Finnish by owners of dogs with chronic signs of pain caused by osteoarthritis. Am J Vet Res. 70: 727 – 734, 2009.

(As translated from Finnish to English)

*Circle the pain and function description that best represents your dog's behaviour:*

Rate your dog's attitude and/or mood:

| 0          | 1     | 2                                     | 3             | 4                                   |
|------------|-------|---------------------------------------|---------------|-------------------------------------|
| Very alert | Alert | Neither alert<br>nor<br>disinterested | Disinterested | Very<br>disinterested/<br>lethargic |

Rate your dog's willingness to participate in play or interact:

| 0            | 1       | 2         | 3              | 4                                             |
|--------------|---------|-----------|----------------|-----------------------------------------------|
| Very willing | Willing | Reluctant | Very reluctant | Does not<br>participate or<br>interact at all |

Rate your dog's frequency in vocalization or discomfort behaviour (audible whining, grunting, yelping, or unusual licking):

| 0     | 1           | 2         | 3     | 4          |
|-------|-------------|-----------|-------|------------|
| Never | Hardly ever | Sometimes | Often | Very often |

Rate your dog's eagerness to walk:

| 0          | 1     | 2         | 3              | 4                               |
|------------|-------|-----------|----------------|---------------------------------|
| Very eager | Eager | Reluctant | Very reluctant | Does not want<br>to walk at all |

Rate your dog's ability and/or willingness to walk up and/or down stairs:

| 0                    | 1            | 2         | 3                 | 4                            |
|----------------------|--------------|-----------|-------------------|------------------------------|
| Very<br>willing/able | Willing/able | Reluctant | Very<br>reluctant | Does not do stairs<br>at all |

Dog's Name:

Date:

### Helsinki Chronic Pain Index con't

Rate your dog's ability and/or willingness to run:

| 0                 | 1            | 2         | 3              | 4                   |
|-------------------|--------------|-----------|----------------|---------------------|
| Very willing/able | Willing/able | Reluctant | Very reluctant | Does not run at all |

Rate your dog's ability and/or willingness to jump (onto bed, couch, vehicle, etc):

| 0                 | 1            | 2         | 3              | 4                    |
|-------------------|--------------|-----------|----------------|----------------------|
| Very willing/able | Willing/able | Reluctant | Very reluctant | Does not jump at all |

Rate your dog's ease in lying down:

| 0         | 1    | 2                          | 3         | 4              |
|-----------|------|----------------------------|-----------|----------------|
| Very easy | Easy | Neither easy nor difficult | Difficult | Very difficult |

Rate your dog's rising from a down position:

| 0         | 1    | 2                          | 3         | 4              |
|-----------|------|----------------------------|-----------|----------------|
| Very easy | Easy | Neither easy nor difficult | Difficult | Very difficult |

Rate your dog's ease of movement after a long rest:

| 0         | 1    | 2                          | 3         | 4              |
|-----------|------|----------------------------|-----------|----------------|
| Very easy | Easy | Neither easy nor difficult | Difficult | Very difficult |

Rate your dog's ease of movement during and/or after exercise/walks (tired, dragging feet, scuffing nails, lying down):

| 0         | 1    | 2                          | 3         | 4              |
|-----------|------|----------------------------|-----------|----------------|
| Very easy | Easy | Neither easy nor difficult | Difficult | Very difficult |
